# Supplementary material for: Designing the shape evolution of SnSe2nanosheets and their optoelectronic properties
Source: Royal Society of Chemistry journal article supplement (doi:10.1039/c5nr05989e), 2015-01-01
Supplement: c5nr05989e1.pdf [file c5nr05989e1.pdf]

## Supporting Information

### Designing Shape Evolution of SnSe<sub>2</sub> Nanosheets and their Optoelectronic Property

Yun Huang, Kai Xu, Zhenxing Wang, Tofik Ahmed Shifa, Qisheng Wang, Feng Wang, Chao Jiang and Jun He\*

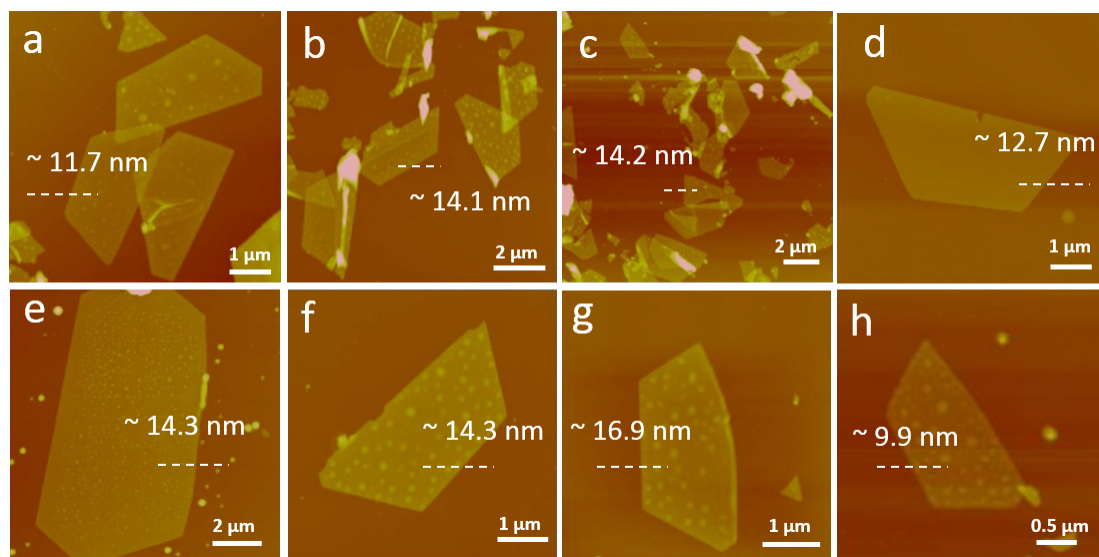

Fig. S1 Complementary AFM profiles of thin SnSe<sub>2</sub> NSs.

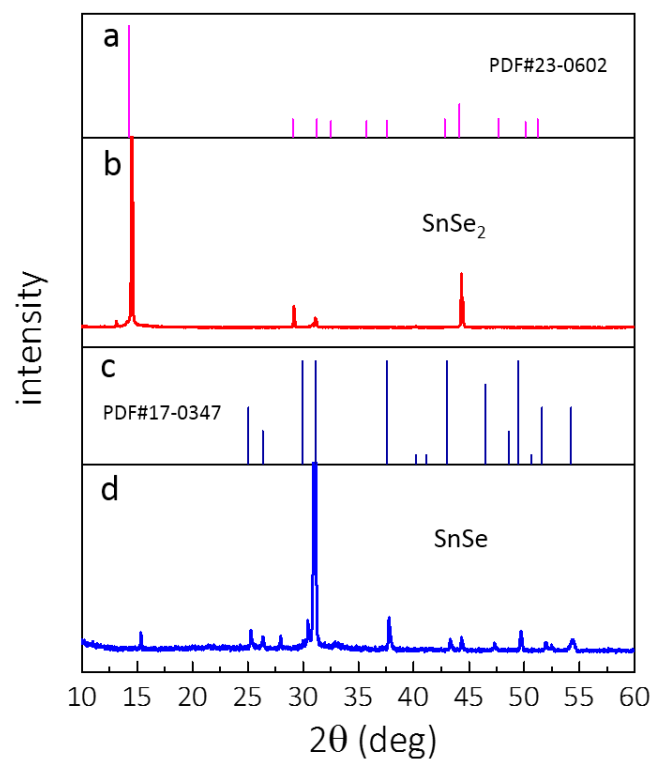

Fig. S2 XRD data of (a) standard  $\text{SnSe}_2$  (b) as grown  $\text{SnSe}_2$  NSs (c) standard  $\text{SnSe}$  and (d) as grown  $\text{SnSe}$  NSs.
